# Supplementary material
Source: PubMed Central journal article supplement (PMC6139570)
Supplement: supp_RA118.002448_136046_2_supp_173634_pcdc8y.pdf [file supp_RA118.002448_136046_2_supp_173634_pcdc8y.pdf]

## Supporting Information

### ***Staphylococcus epidermidis* small basic protein (Sbp) forms amyloid fibrils, consistent with its function as a scaffolding protein in biofilms \***

Yan Wang<sup>‡1</sup>, Jingbo Jiang<sup>‡1</sup>, Yachao Gao<sup>‡1</sup>, Yang Sun<sup>‡</sup>, Yang Wu<sup>||</sup>, Di Qu<sup>||</sup>, Gang Ma<sup>§</sup>,  
and Xianyang Fang<sup>‡2</sup>

From the <sup>‡</sup>Beijing Advanced Innovation Center for Structural Biology, School of Life Sciences, Tsinghua University, Beijing 100084, China, <sup>||</sup> Key Laboratory of Medical Molecular Virology of the Ministry of Education and Ministry of Public Health, Department of Medical Microbiology and Parasitology, Shanghai Medical College of Fudan University, 138 Yixueyuan Road, 200032 Shanghai, P.R. China, <sup>§</sup>Key Laboratory of Medicinal Chemistry and Molecular Diagnosis of Ministry of Education, Key Laboratory of Analytical Science and Technology of Hebei Province, College of Chemistry and Environmental Science, Hebei University, Baoding 071002, China

<sup>1</sup>These authors contributed equally to this work.

<sup>2</sup>To whom correspondence may be addressed. Tel: (86)-10-62771071; E-mail: fangxy@tsinghua.edu.cn.

**Table S1.** The primer sequences for cloning of Sbp and Brpt1.5.

| Primers         | DNA sequences                                                       |
|-----------------|---------------------------------------------------------------------|
| Sbp-forward     | 5'CGTGCATATGGAGAATCTTTATTTTCAGGGCGGAAAC<br>AACGTTGAAGCGGCAACTGG3'   |
| Sbp-reverse     | 5'CGTGAAGCTTTTATTTATTTAAGTCTATACGATATAA<br>CTTCACATTTTATCTTTTGGTG3' |
| Brpt1.5-forward | 5'CGTGCATATGGAGAATCTTTATTTTCAGGGCGTTGAT<br>GGAGATTCGATTACGTCAACG3'  |
| Brpt1.5-reverse | 5'GCGTGGATCCTTATGGACCATACTCAACAATTCGTC<br>AACAGG3'                  |

**Table S2.** Basic structural parameters for Sbp in the lag phase of fibrillation at different time points.

| Time (hr) | <sup>a</sup> R <sub>g</sub> (Å) | <sup>b</sup> R <sub>g</sub> (Å) | D <sub>max</sub> (Å) | <sup>c</sup> MW (kD) | <sup>d</sup> MW (kD) |
|-----------|---------------------------------|---------------------------------|----------------------|----------------------|----------------------|
| 0.4       | 29.9±0.8                        | 31.2±0.2                        | 113±2                | 17.7                 | 25.2                 |
| 1.0       | 31.9±1.3                        | 33.1±0.3                        | 123±2                |                      | 27.8                 |
| 1.2       | 33.1±1.0                        | 35.9±0.2                        | 128±2                |                      | 27.9                 |
| 2.0       | 35.0±2.2                        | 36.4±1.3                        | 154±2                |                      | 29.1                 |

<sup>a</sup>R<sub>g</sub> derived from Guinier fitting;

<sup>b</sup>R<sub>g</sub> derived from GNOM analysis;

<sup>c</sup>MW was calculated from the primary sequences of protein;

<sup>d</sup>MW was calculated using the web portal “SAXS MoW” ([www.if.sc.usp.br/~SAXS](http://www.if.sc.usp.br/~SAXS)).

## Figure legend

**Supplemental Figure S1.** Size exclusion chromatography profile of Sbp recorded at double wavelength of 280 nm (black) and 260 (red) nm at 20 mM Tris-HCl, 100 mM KCl, pH 7.2. The inset is the SDS-PAGE gel of Sbp fractions.

**Supplemental Figure S2.** 2D  $^1\text{H}$ - $^{15}\text{N}$  HSQC of rSbp in buffer containing 20 mM  $\text{K}_2\text{HPO}_4$ , 100 mM KCl, pH 7.20 at 5 °C (**A**) and 37 °C (**B**), in buffer containing 20 mM  $\text{K}_2\text{HPO}_4$ , 300 mM KCl, pH 7.20 at 15 °C (**C**), buffer containing 20 mM  $\text{K}_2\text{HPO}_4$ , 400 mM KCl, pH 7.20 at 15 °C (**D**).

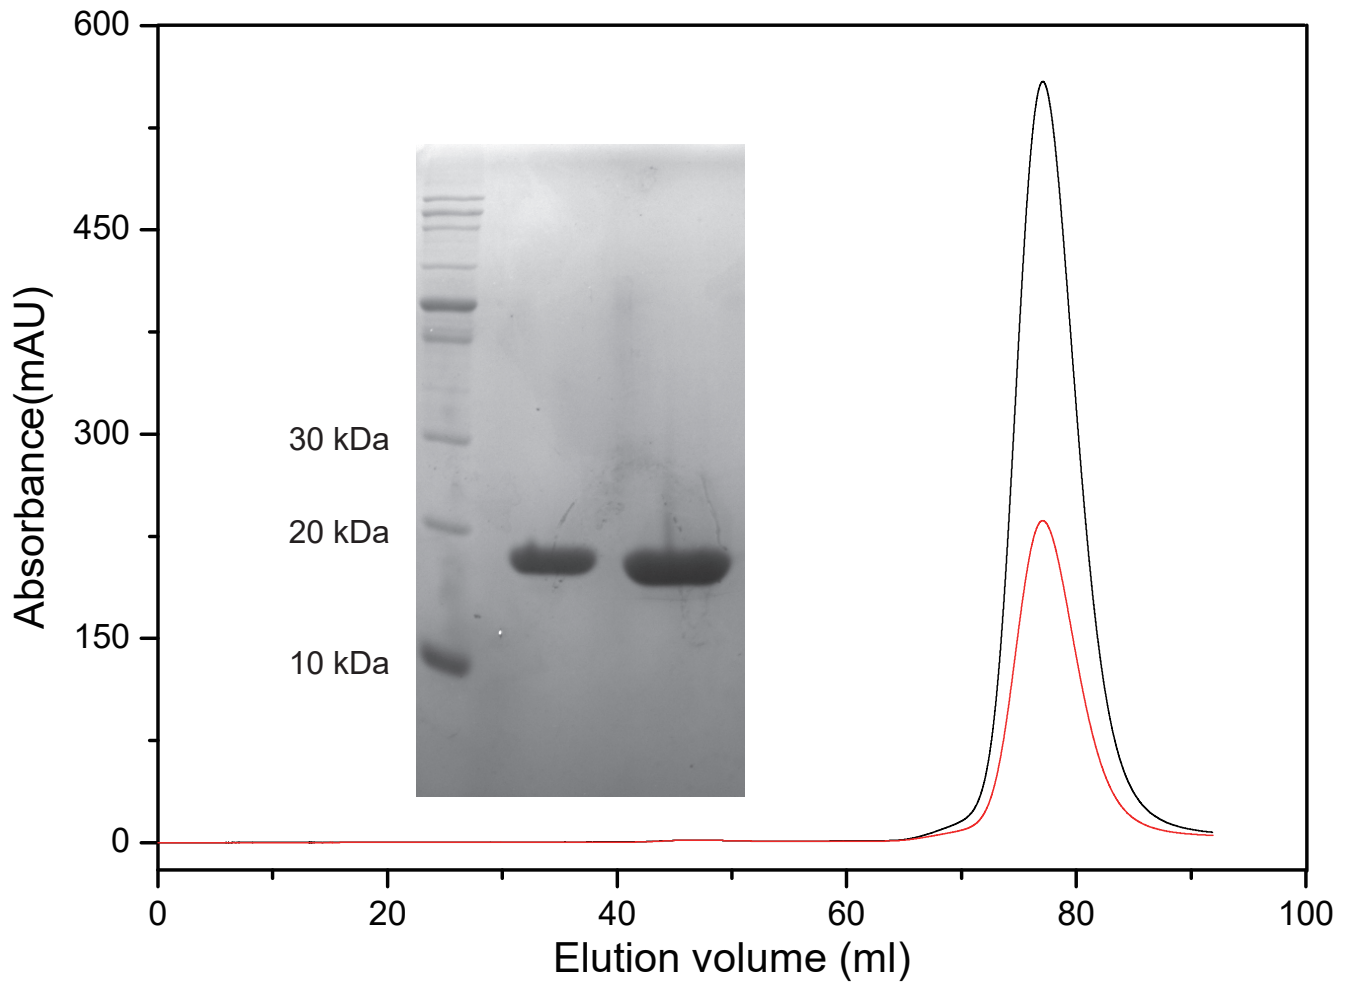

Figure S1

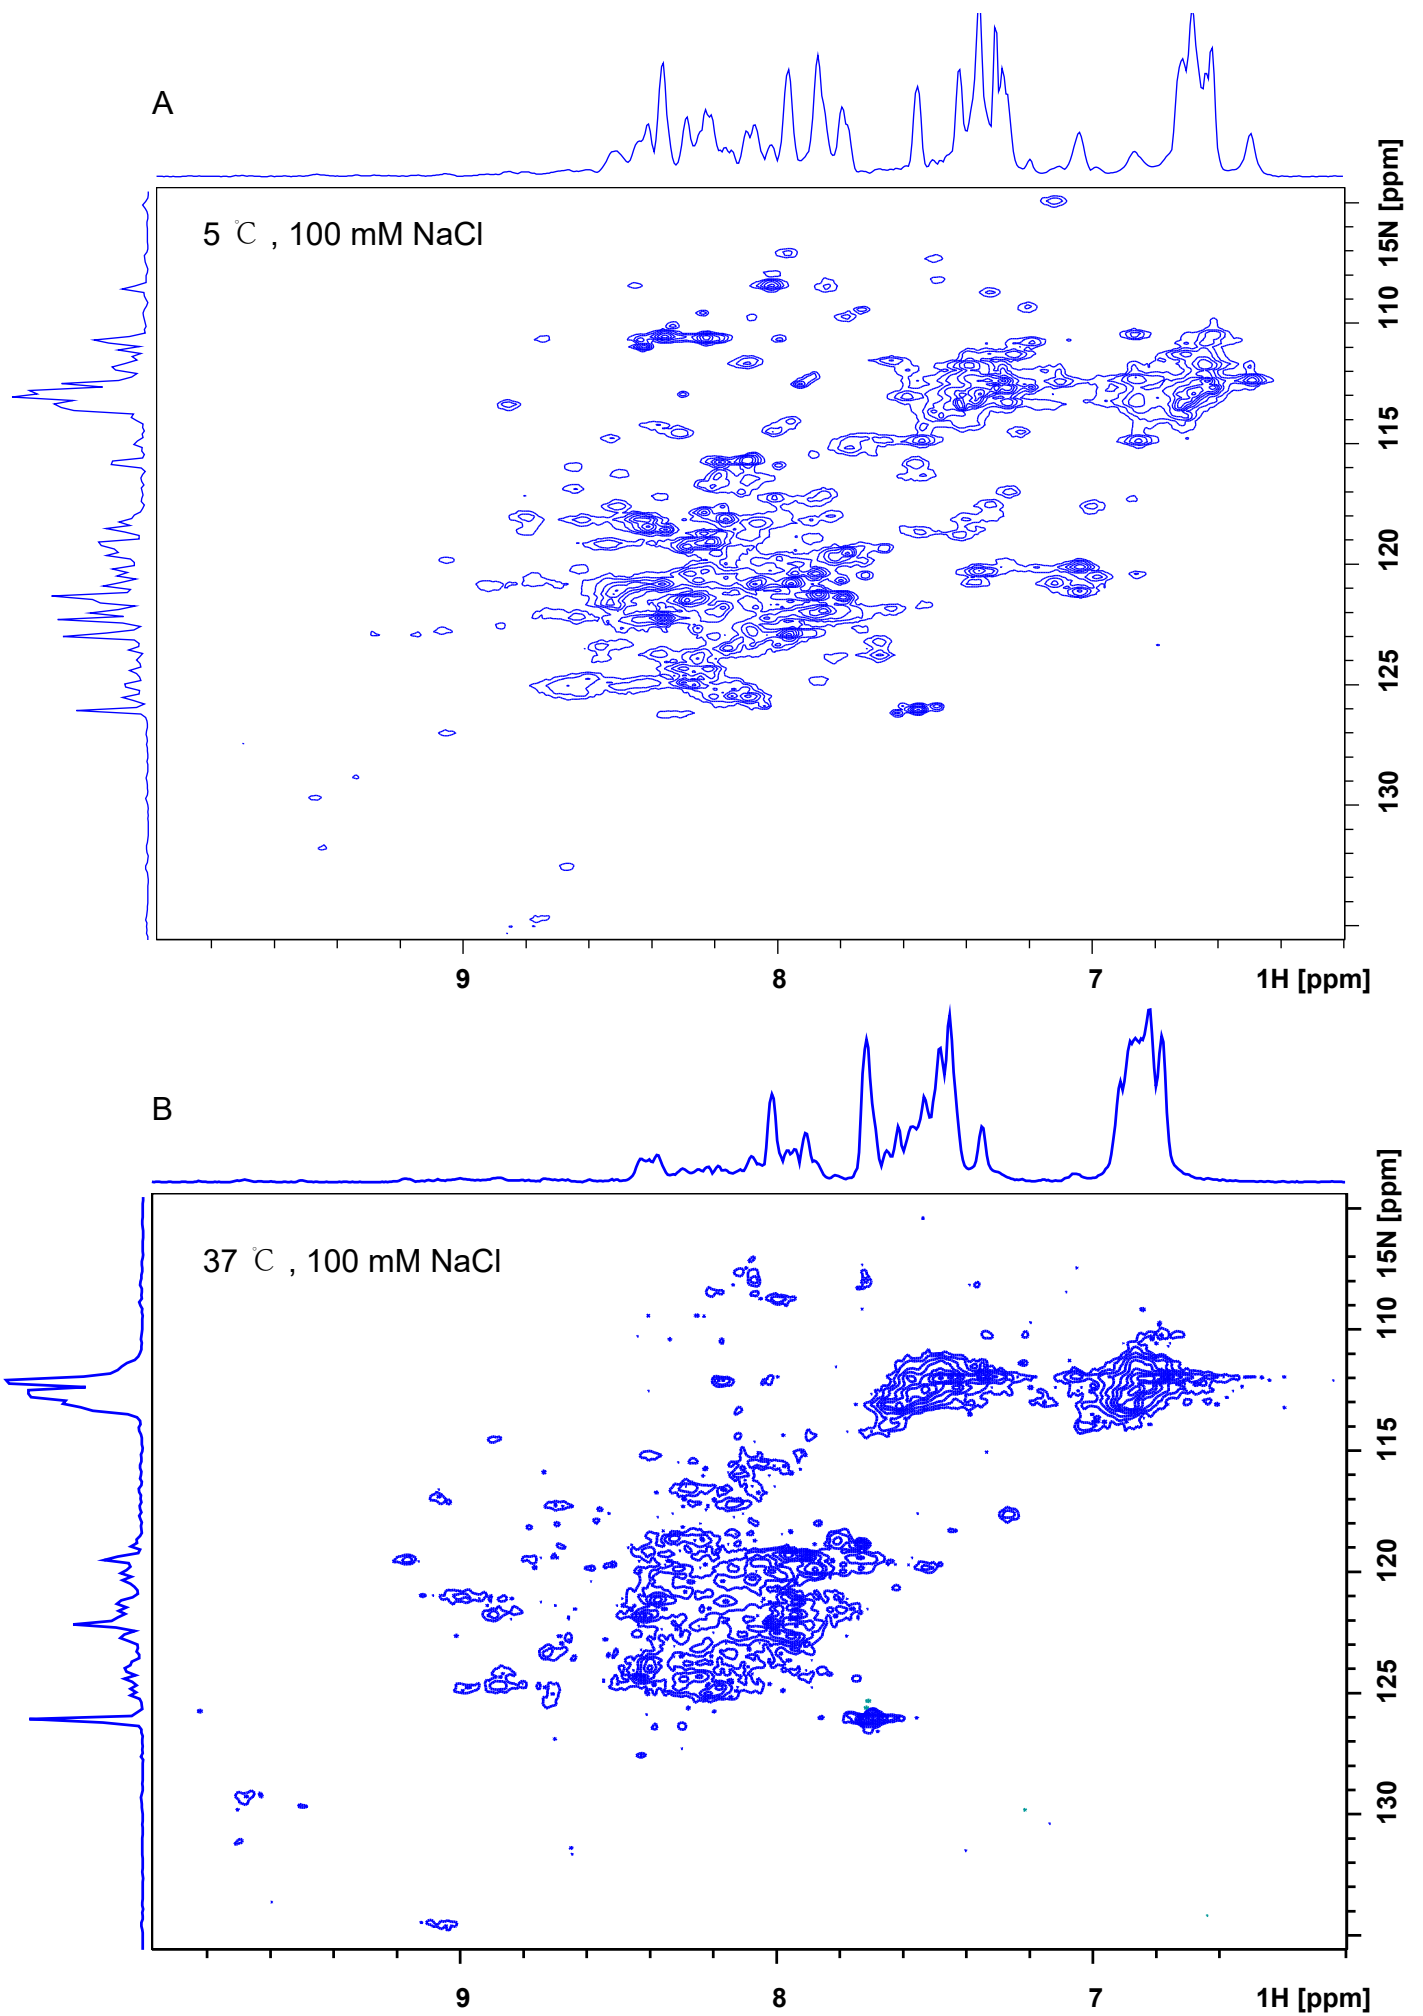

Figure S2.A-B

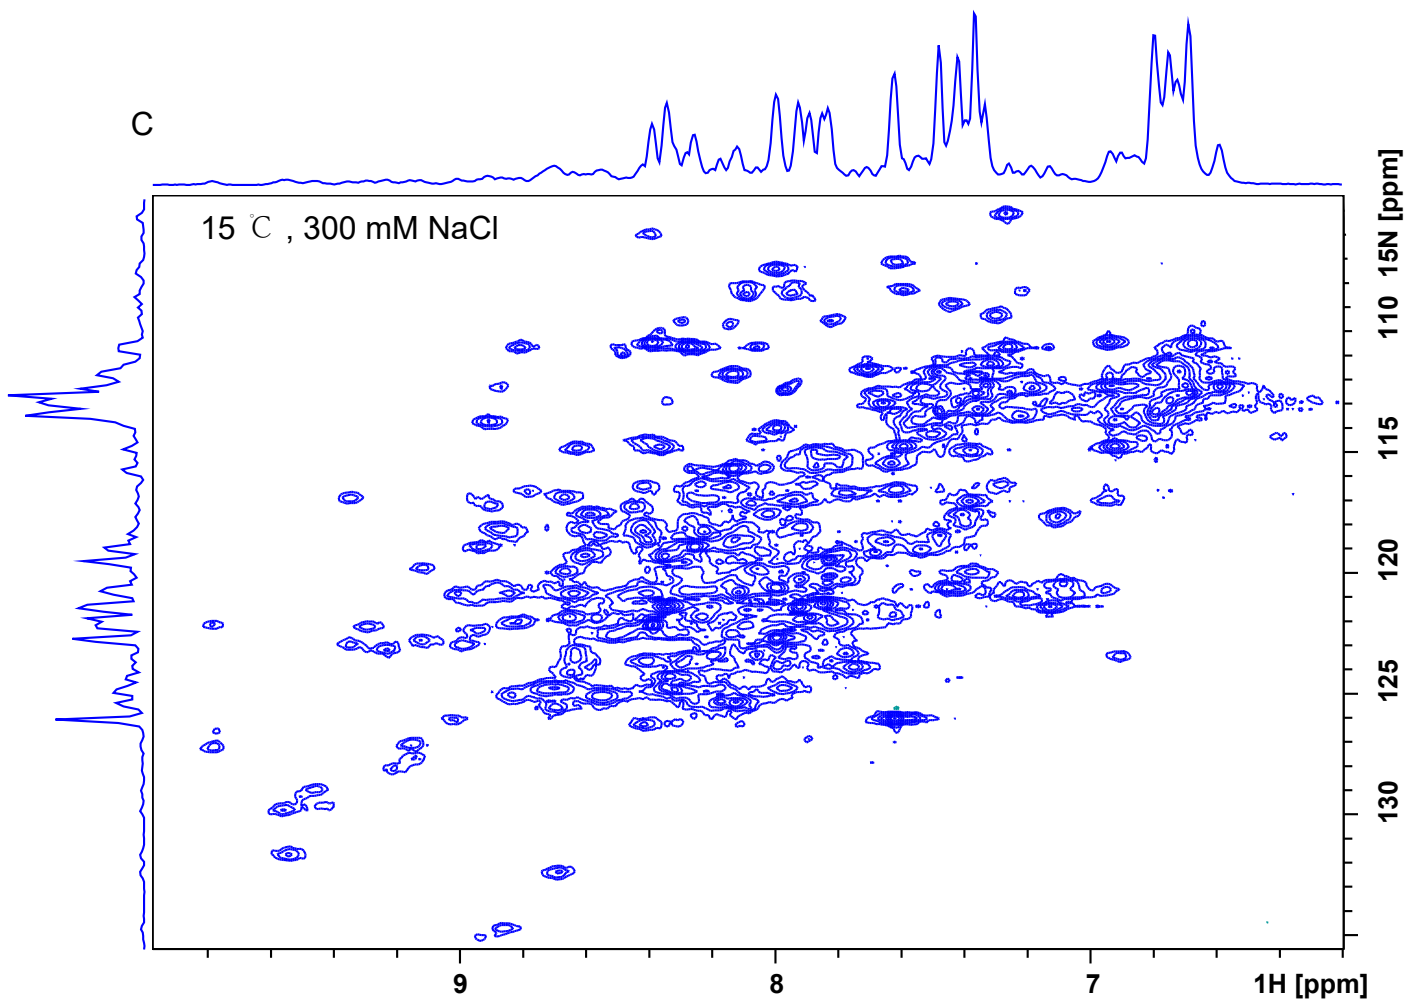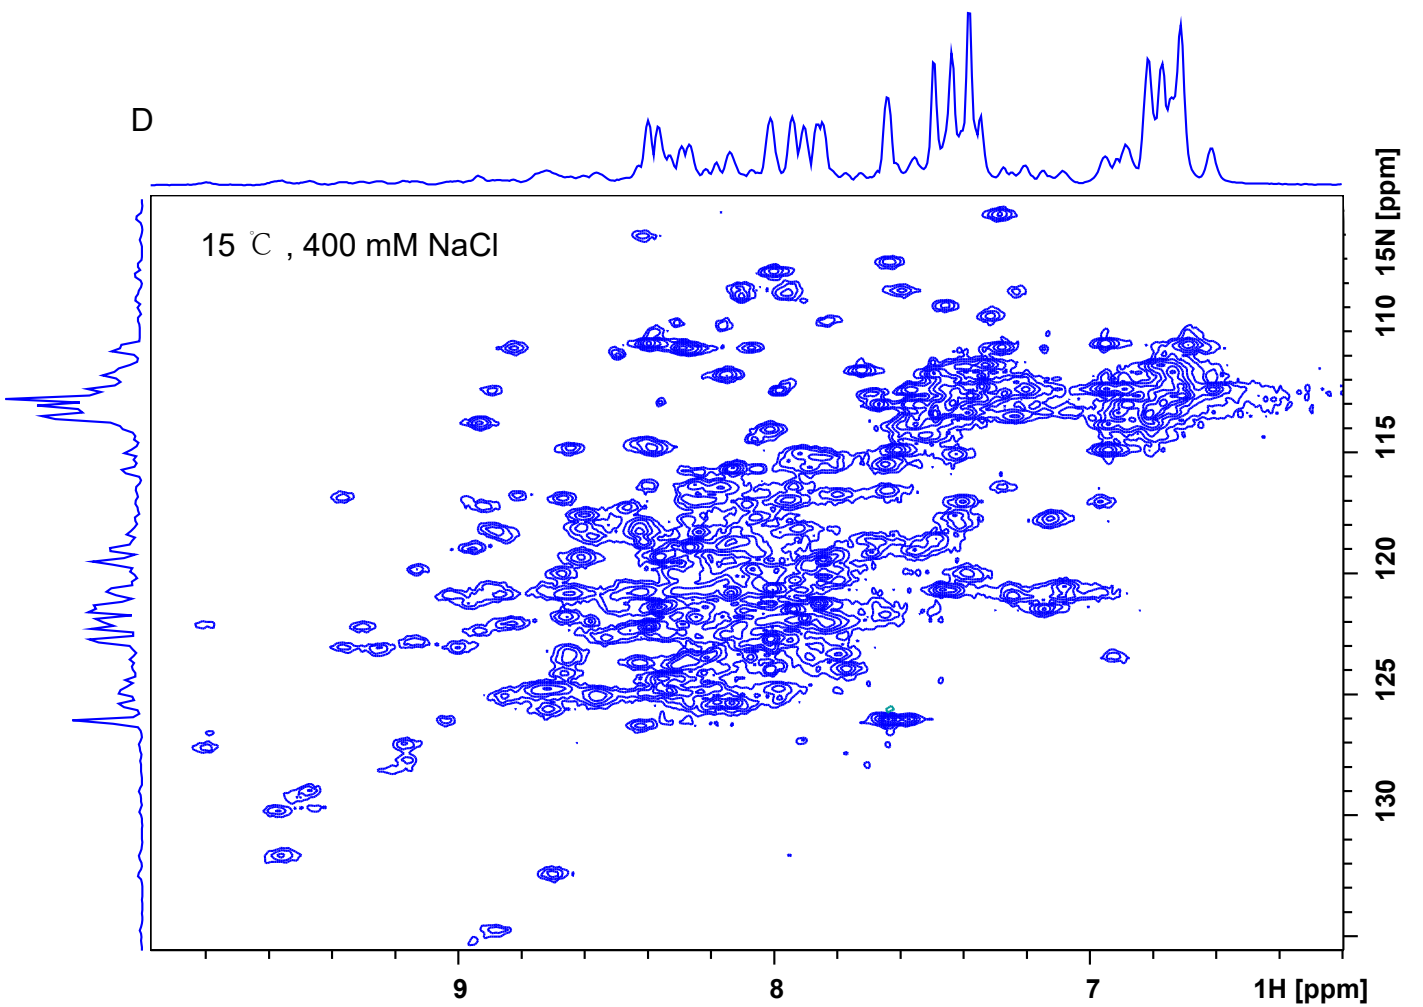

Figure S2.C-D
